1 **Dietary vitamin B12 regulates chemosensory receptor gene expression via**  
2 **the MEF2 transcription factor in *Caenorhabditis elegans***

3  
4 Aja McDonagh<sup>1</sup>, Jeannette Crew<sup>1</sup>, and Alexander M. van der Linden<sup>#1</sup>

5  
6 <sup>1</sup>, Department of Biology, University of Nevada, Reno, Nevada, 89557

7  
8 #, corresponding author

9  
10 Correspondence to Alexander van der Linden: [avanderlinden@unr.edu](mailto:avanderlinden@unr.edu)

11  
12 **Running title:** Diet modulation of chemoreceptor gene expression

13  
14 **Key words:** diet, vitamin B12, *Caenorhabditis elegans*, *srh-234*, chemosensory  
15 receptor gene, ADL, sensory neurons, plasticity

16  
17 **Email addresses:**

18 Alexander van der Linden: [avanderlinden@unr.edu](mailto:avanderlinden@unr.edu)

19 Aja McDonagh: [aja@nevada.unr.edu](mailto:aja@nevada.unr.edu)

20 Jeannette Crew: [jeannettec@nevada.unr.edu](mailto:jeannettec@nevada.unr.edu)

21  
22 **ABSTRACT**

23 **Dynamic changes in chemoreceptor gene expression levels in sensory neurons**  
24 **is one strategy that an animal can use to modify their responses to dietary**  
25 **changes. However, the mechanisms underlying diet-dependent modulation of**  
26 **chemosensory gene expression are unclear. Here, we show that the expression**  
27 **of the *srh-234* chemoreceptor gene localized in a single ADL sensory neuron type**  
28 **of *C. elegans* is downregulated when animals are fed a *Comamonas* bacterial diet,**  
29 **but not on an *E. coli* diet. Remarkably, this diet-modulated effect on *srh-234* gene**  
30 **expression levels is dependent on the micronutrient vitamin B12 endogenously**  
31 **produced by *Comamonas* bacteria. Excess propionate and genetic perturbations**  
32 **in the canonical and shunt propionate breakdown pathways are able to override**  
33 **the repressing effects of vitamin B12 on *srh-234* expression. The vitamin B12-**  
34 **mediated regulation of *srh-234* expression levels in ADL requires the MEF-2**  
35 **transcription factor, providing a potential mechanism by which dietary vitamin**  
36 **B12 may transcriptionally tune individual chemoreceptor genes in a single**  
37 **sensory neuron type, which in turn may change animal responses to biologically**  
38 **relevant chemicals in their diet.**

## 41 INTRODUCTION

42 Animals receive dietary inputs from their environment and their internal metabolic state,  
43 which allows them to modify their chemosensory response properties and behavioral  
44 outcomes (Sengupta 2012). One strategy that animals can use to trigger long term  
45 changes in behavioral outcomes is by dynamically changing the expression of individual  
46 chemoreceptor genes present in chemosensory neurons. These dynamic changes in  
47 chemoreceptor gene expression in response to food and internal feeding state is  
48 observed in different invertebrate systems and play pivotal roles in their ability to seek  
49 food and reproduce (Fox et al. 2001; Hallem et al. 2004; Rinker et al. 2013; Ryan et al.  
50 2014; Khan et al. 2021; Taparia et al. 2017), but the mechanisms controlling this  
51 plasticity in chemoreceptor gene expression are unclear.

52  
53 The nematode *C. elegans* is an excellent model organism to study interactions between  
54 an animal and its dietary sources (Zhang et al. 2017; Yilmaz and Walhout 2014). *C.*  
55 *elegans* is a bacterivore, making it easy to expose *C. elegans* to different bacterial  
56 strains to study their effects on organismal health and physiology. Bacterially-derived  
57 factors affect *C. elegans* in various ways; for instance, pathogenic factors are sensed by  
58 chemosensory neurons and trigger avoidance behaviors (Pradel et al. 2007; Meisel et  
59 al. 2014), while other bacterially-derived factors are innocuous and contribute to  
60 physiology and development (Coolon et al. 2009; Gracida and Eckmann 2013). Recent  
61 work demonstrated that vitamin B12 obtained by *C. elegans* through its bacterial diet is  
62 an important nutritional factor in developmental growth and physiology of *C. elegans*  
63 (MacNeil et al. 2013). The vitamin B12 status of *C. elegans* can be easily assessed with  
64 help of the *acdH-1p::gfp* reporter, which is expressed in response to propionate  
65 accumulation resulting from B12 deficiency (Watson et al. 2013; Watson et al. 2014;  
66 Watson et al. 2016). When fed a vitamin B12-deficient *E. coli* OP50 diet, *acdH-1* is  
67 highly expressed in animals, whereas *acdH-1* is lowly expressed when grown on the  
68 vitamin B12-producing *Comamonas* DA1877 diet. The effects of these bacterial diets on  
69 *acdH-1* promoter activity have led to important insights into the vitamin B12-dependent  
70 and independent propionate breakdown pathways.

71  
72 *C. elegans* is also an ideal organism to study the plasticity in expression levels of  
73 individual chemosensory receptor genes in response to external and internal signals  
74 (Vidal et al. 2018; Gruner and van der Linden 2015). Our prior study showed that the  
75 expression levels of the *srh-234* chemoreceptor gene in the ADL sensory neuron type is  
76 regulated by starvation. This starvation-mediated modulation of *srh-234* expression  
77 levels is dependent on sensory inputs into ADL neurons perceiving food presence, and  
78 circuit inputs from RMG interneurons that are electrically connected to ADL perceiving  
79 internal state of starvation signals (Gruner et al. 2014). Circuit inputs from RMG into  
80 ADL regulating *srh-234* required the NPR-1 neuropeptide receptor acting in RMG, as

81 well as insulin signals from other tissues acting on the DAF-2 insulin receptor in ADL  
82 (Gruner et al. 2014). In addition, starvation-mediated regulation of *srh-234* expression  
83 levels in ADL is regulated by both cell- and non-cell-autonomous transcriptional  
84 mechanisms involving basic helix-loop-helix (bHLH) factors, including HLH-30 and MXL-  
85 3 acting in the intestine, and HLH-2/3 acting together with the MEF-2 factor in ADL  
86 neurons (Gruner et al. 2016). Together, these findings demonstrated that expression of  
87 the *srh-234* chemoreceptor gene in a single ADL sensory neuron type of *C. elegans* is  
88 regulated by multiple transcriptional modules, and revealed a neuron-to-intestine  
89 connection involving insulin signals in the modulation of chemoreceptor genes as a  
90 function of the *C. elegans* feeding state (Gruner and van der Linden 2015).

91  
92 In this study, we discovered that feeding *C. elegans* vitamin B12-producing  
93 *Comamonas* bacteria regulates the expression levels of the *srh-234* chemoreceptor  
94 gene in ADL neurons. We show that *srh-234* gene expression is strongly downregulated  
95 in ADL when animals are fed a high vitamin B12 diet of *Comamonas* DA1877 bacteria  
96 relative to a low vitamin B12 diet of *E. coli* OP50 bacteria. This dietary effect of vitamin  
97 B12 on *srh-234* in ADL appears to be distinct from the starvation response we  
98 previously reported (Gruner et al. 2014). Mutant bacteria of *Comamonas* deficient in  
99 vitamin B12 production indicated that *Comamonas*-supplied vitamin B12 regulates *srh*-  
100 234 expression levels in ADL. The repressing effects of vitamin B12 on *srh-234* can be  
101 suppressed by propionate supplementation and genetic perturbations in the canonical  
102 and shunt propionate breakdown pathways. The effects of vitamin B12 on *srh-234*  
103 expression is likely through food ingestion rather than directly sensing B12. Vitamin  
104 B12-mediated downregulation of *srh-234* is dependent on the MEF-2 transcription  
105 factor. Together, these findings reveal that bacterially-derived vitamin B12 turn  
106 individual chemoreceptor genes on and off at the level of transcription in sensory  
107 neurons that may inform our understanding of how animals fine-tune their  
108 chemosensory responses to biologically relevant chemicals in their diet.

109

## 110 MATERIAL AND METHODS

### 111 *C. elegans* strains and growth conditions

112 Strains used in this study were: wild-type N2 *C. elegans* variety Bristol, RB1774 *pcca*-  
113 1(*ok2282*), VC1307 *pccb-1(ok1686)*, VC1011 *acdh-1(ok1489)*, RB2572 *hphd*-  
114 1(*ok3580*), RB755 *metr-1(ok521)*, NYL2498 *mrp-5(yad138)*, JIN1375 *hlh-30(tm1978)*,  
115 and KM134 *mef-2(gv1)*. Transgenic strains used in this study were: VDL3 *oyIs56[srh*-  
116 234*p::gfp, unc-122p::rfp]*, VDL497 *sanEx497[sre-1p::gfp, rol-6]*, VDL494 *sanEx494[sre*-  
117 1*p(+MEF2)::gfp, rol-6]*, and VL749 *wwIs24[acdh-1p::gfp, unc-119(+)]*. Animals were  
118 cultivated at 20°C on the surface of Nematode Growth Media (NGM) agar. Unless  
119 specified otherwise, animals were fed *E. coli* OP50 as the primary food source (Brenner  
120 1974). Genotypes used in this study were confirmed by PCR (for example, identifying

121 deletions), or by sequencing a PCR product (for example, identifying single nucleotide  
122 changes).

123

### 124 **Bacterial strains and growth conditions**

125 Bacterial strains used in this study were: *E. coli* OP50, *E. coli* HT115 (DE3), *E. coli*  
126 HB101, *E. coli* BW25113, *E. coli*  $\Delta$ *tonB* JW5195, *Comamonas aq.* DA1877,  
127 *Comamonas aq.*  $\Delta$ *cbiA* and  $\Delta$ *cbiB* mutants. Bacterial cultures were grown under  
128 standard conditions in Luria Broth (LB) media until the Optical Density (OD) 600  
129 reached approximately 0.6. *Comamonas* mutants were cultured in the presence of 100  
130  $\mu$ g/ml streptomycin plus 20  $\mu$ g/ml gentamycin as a selection marker. Presence of these  
131 antibiotics did not alter the levels of *srh-234p::gfp* expression.

132

### 133 **Measurement and quantification of *gfp*-reporter expression levels**

134 Animals carrying chemoreceptor::*gfp* reporter genes (i.e., *srh-234*, *sre-1*) were  
135 cultivated at 20°C on NGM plates seeded with *E. coli* OP50 as the bacterial food source  
136 unless indicated otherwise. Gravid adults were transferred to assay plates and removed  
137 after laying eggs. The eggs were then allowed to develop to adults. The increased rate  
138 of development when fed *Comamonas* DA1877 was accounted for, and levels of  
139 promoter::*gfp* expression of adult animals were then imaged and measured under a  
140 microscope equipped with epifluorescence as previously described (Gruner et al. 2014;  
141 Gruner et al. 2016). Briefly, we mounted animals on 2% agarose pads containing 10  
142 mM levamisole, and visualized them on a Leica DM5500 compound microscope  
143 equipped with epifluorescence and a Hamamatsu CCD-camera. Microscope and  
144 camera settings were kept constant between images of different genotypes and  
145 conditions used, unless indicated otherwise. The mean pixel intensity  
146 of *gfp* fluorescence in the entire cell-body of ADL was quantified using Volocity software  
147 (version 6.3). Prior to measurement, images of ADL cell-bodies were cropped for  
148 promoter-*gfp* expression level analysis.

149

### 150 **Analysis of *srh-234p::gfp* expression**

151 To analyze *srh-234* expression in mixed bacterial diets, animals carrying the *srh-*  
152 *234p::gfp* reporter were exposed to mixed set ratios, i.e., 1:1, 9:1, and 99:1 ratio of *E.*  
153 *coli* OP50 to *Comamonas aq.* DA1877. To prepare plates, liquid bacterial cultures of  
154 OP50 and DA1877 were grown overnight at 37°C in LB broth, and diluted or  
155 concentrated to the same OD600. Bacteria were seeded onto peptone-free NGM agar  
156 plates to minimize bacterial growth. Adults expressing the *srh-234p::gfp* reporter were  
157 transferred to plates and removed after eggs were laid. Eggs were allowed to develop to  
158 adulthood in the presence of the mixed bacterial diets, and *srh-234p::gfp* expression  
159 levels were measured and quantified as described above.

160

161 To analyze *srh-234* expression in the presence of exogenous vitamin B12 and propionic  
162 acid (aka propionate), animals carrying the *srh-234p::gfp* reporter were transferred to  
163 NGM plates seeded with *E. coli* OP50 supplemented with or without vitamin B12  
164 (methylcobalamin or MeCbl, Sigma, Cat #13422-55-4; adenosylcobalamin or AdoCbl,  
165 Sigma, Cat #13870-90-1) and propionic acid (Sigma, Cat #79-09-4). Stocks were made  
166 in either ethanol (for MeCbl) and water (for AdoCbl and Propionic acid) to the maximum  
167 soluble concentration. Vitamin B12 and propionic acid was diluted to a final 64 nM and  
168 40 mM concentration, respectively, in NGM agar prior to plate pouring. For *E. coli* OP50  
169 supplementation assays with increasing MeCbl concentrations, we created a dilution  
170 series from a 1 mM MeCbl stock. To confirm vitamin B12 action, *acdH-1p::gfp* reporter  
171 animals were used as a control in parallel to the *srh-234p::gfp* expression analysis.

172  
173 For bacterial olfactory assays, *srh-234p::gfp* reporter animals were exposed to either *E.*  
174 *coli* OP50 or *Comamonas* DA1877 bacteria seeded on a NGM agar square placed on  
175 the inside of a petri dish lid. For the quadrant petri dish assay, NGM plates were seeded  
176 in each quadrant with either OP50 or DA1877 diets (**Fig. S4**). *srh-234p::gfp* reporter  
177 animals were then transferred to a single quadrant of the plate allowing only a single  
178 diet for food ingestion, while allowing olfactory cues of the surrounding diets.

179  
180 For generating inedible food, *Comamonas* DA1877 bacteria were treated with the  
181 antibiotic aztreonam (Sigma, Cat #78110-38-0). Briefly, DA1877 bacteria were grown in  
182 LB to log phase at 37°C with shaking. Cultures were mixed with aztreonam to a final  
183 concentration of 10 µg/ml for an additional three hours with minimal shaking to prevent  
184 bacterial shearing. Aztreonam-treated bacteria were spread onto the NGM agar plates  
185 and immediately dried and used the same day, because the septum inhibitory effects of  
186 aztreonam are short lived. *srh-234p::gfp* reporter animals were then transferred as  
187 young adults to plates containing aztreonam-treated DA1877.

188

### 189 **Dye-filling of ADL sensory neurons**

190 A stock dye solution containing 5 mg/µl red fluorescent lipophilic dye Dil (Sigma, Cat  
191 #41085-99-8) was diluted in M9 buffer by 10,000 times for optimal signal intensity.  
192 Animals carrying the *srh-234p::gfp* reporter were soaked in Dil for one hour and then  
193 rinsed with M9 buffer twice. Stained animals were recovered for one hour on NGM  
194 plates seeded with either *E. coli* OP50 or *Comamonas* DA1877 before examination of  
195 dye-filled ADL neurons with a Leica DM5500 microscope equipped with  
196 epifluorescence.

197

### 198 **Statistical analysis**

199 All results are expressed as means with 95% confidence intervals. Data sets were first  
200 analyzed for Gaussian distribution using a normality test ( $\alpha = 0.05$ ,  $p > 0.05$ ) using

201 either the Shapiro-Wilk test or D'Agostino and Pearson normality test to determine  
202 whether a parametric or non-parametric statistical test should be performed. Statistical  
203 comparisons made for two groups include an unpaired *t*-test (parametric) or the Mann-  
204 Whitney *t*-test (non-parametric). For more than two groups, the ordinary one-way  
205 ANOVA (parametric) or the Kruskal-Wallis test (non-parametric) was used followed by a  
206 posthoc multiple comparisons test. Specific statistical tests and *p*-values are reported in  
207 the Figure legends. All data were graphed and analyzed using Graphpad Prism 9  
208 software.

209

## 210 RESULTS

### 211 Expression of *srh-234* is downregulated when animals are fed a *Comamonas* diet

212 To study how bacterial diet regulates chemoreceptor gene expression levels in *C.*  
213 *elegans*, we used the candidate *srh-234* chemoreceptor gene specifically expressed in  
214 a single sensory neuron type, ADL. We previously found that *gfp* expression driven by  
215 only 165 bp *cis*-regulatory sequence of *srh-234* (referred to as *srh-234p::gfp*) is rapidly  
216 (<1 hr) downregulated in starved animals (Gruner et al. 2014). While testing the *srh-*  
217 *234p::gfp* reporter in different bacterial diets, we observed that animals fed a  
218 *Comamonas* DA1877 diet downregulate *srh-234* expression in ADL neurons similar in  
219 response to starvation; that is *srh-234p::gfp* expression levels in adult animals is  
220 strongly reduced when fed a *Comamonas* DA1877 diet compared to a *E. coli* OP50 diet  
221 (**Fig. 1A**). This *Comamonas*-mediated downregulation of *srh-234* expression levels is  
222 rapid as adults raised on *E. coli* OP50 and then transferred to a DA1877 diet reduce  
223 *srh-234p::gfp* expression in ADL neurons by 50% after 2 hours (**Fig. S1A**). Animals fed  
224 other *E. coli* diets such as the K12/B-type hybrid HB101 strain, and the K12-type HT115  
225 strain commonly used in *C. elegans* research showed a *srh-234* expression phenotype  
226 intermediate to that of *E. coli* OP50 and *Comamonas* DA1877 diets (**Fig. S1B**).

227

228 The dietary effect of *Comamonas* DA1877 on *srh-234* expression appears to be distinct  
229 from the starvation response, because mixing the *E. coli* OP50 diet with *Comamonas*  
230 DA1877 diet 1:1 resulted in animals in which *srh-234* expression levels remained  
231 strongly reduced similar to starvation (**Fig. 1B**). Moreover, smaller concentrations of  
232 *Comamonas* DA1877 by diluting it in *E. coli* OP50 (i.e., 9:1 and 99:1 OP50/DA1877)  
233 was sufficient to strongly reduce *srh-234* expression. Others have reported that  
234 *Comamonas* DA1877 bacteria are not a nutrient-poor diet for *C. elegans* (Shtonda and  
235 Avery 2006; MacNeil et al. 2013), suggesting that *Comamonas* may generate a  
236 bacterial signal that regulates *srh-234* expression levels. This dietary effect of  
237 *Comamonas* on *srh-234* may be specific since expression of another ADL-specific *sre-1*  
238 chemoreceptor is not affected (**Fig. S1C**). Since we previously showed that altered  
239 sensory (i.e. cilia, dendrites) inputs into ADL neurons can dramatically reduce *srh-*  
240 *234p::gfp* expression levels (Gruner et al. 2014), it remains possible that *Comamonas*

241 affects the integrity of ADL neurons; however, animals show normal dye-filling (100% of  
242 animals dye-fill, n>20) and a normal ADL morphology determined by *sre-1p::gfp*  
243 expression when fed with the *Comamonas* DA1877 diet (**Fig. S1D**). Together, these  
244 results suggest that in addition to starvation, a dilutable bacterial metabolite produced  
245 by *Comamonas* bacteria regulates *srh-234* expression levels in ADL neurons.

246

### 247 **Vitamin B12 produced by *Comamonas aq.* represses *srh-234* expression**

248 The strain *Comamonas* DA1877 produces the dilutable metabolite vitamin B12, while  
249 the *E. coli* OP50 strain is not able to synthesize vitamin B12 (Watson et al. 2014). To  
250 test the hypothesis that vitamin B12 downregulates *srh-234* expression levels in ADL  
251 neurons, we examined *C. elegans* animals fed a *E. coli* OP50 diet supplemented with  
252 two biologically active and interconvertible forms of vitamin B12, adenosylcobalamin  
253 (AdoCbl) and methylcobalamin (MeCbl). We found that animals fed an *E. coli* OP50 diet  
254 supplemented with either 64 nM AdoCbl or MeCbl was sufficient to strongly reduce *srh-*  
255 *234p::gfp* expression in ADL neurons (**Fig. 2A**), suggesting that vitamin B12 represses  
256 the expression of *srh-234*. Moreover, supplementing *E. coli* OP50 with increasing  
257 concentrations (nM doses) of MeCbl resulted in a dose-dependent reduction of *srh-*  
258 *234p::gfp* expression (**Fig. S2A**), which fits with our observation that diluting  
259 *Comamonas* into the *E. coli* diet is sufficient to reduce *srh-234* expression levels (**Fig.**  
260 **1B**). As a control, we found similar dose-dependent effects of MeCbl using the *acdH-*  
261 *1p::gfp* reporter (**Fig. S2B**), which is known to be downregulated in the intestine when  
262 fed the vitamin B12-producing *Comamonas* bacteria or when fed *E. coli* OP50  
263 supplemented with vitamin B12 (Watson et al. 2014; MacNeil et al. 2013). These results  
264 are also consistent with the observed *srh-234* expression phenotype of animals raised  
265 on *E. coli* HT115 and HB101 diets (**Fig. S1B**), which have higher vitamin B12 levels  
266 compared to the *E. coli* OP50 diet (Revtovich et al. 2019). Thus, vitamin B12  
267 supplementation to an *E. coli* diet can repress the expression of *srh-234* in ADL.

268

269 The vitamin B12-mediated reduction in *srh-234* expression levels in ADL could be  
270 explained by the fact that additional vitamin B12 added to *E. coli* may alter the  
271 metabolism of these bacteria by, for instance, decreasing the production of a toxic  
272 bacterial metabolite. Alternatively, *E. coli* may modify or metabolize vitamin B12 by  
273 creating a secondary by-product which in turn could reduce *srh-234* expression levels.  
274 To distinguish between these possibilities, we fed animals expressing the *srh-234p::gfp*  
275 reporter either live or ultraviolet (UVC)-killed *E. coli* OP50 bacteria in the presence of  
276 vitamin B12 and compared their *srh-234* expression levels. While UVC-killed bacteria of  
277 *E. coli* OP50 in the absence of vitamin B12 did not significantly alter *srh-234* expression  
278 (**Fig. 2B**), we found that *srh-234p::gfp* expression in the presence of vitamin B12 (64 nM  
279 MeCbl) is repressed equally well when supplemented to either live or UVC-killed *E. coli*  
280 OP50 bacteria (**Fig. 2B**). Similarly, UVC-killed *Comamonas* DA1877 did not affect the

281 *srh-234p::gfp* expression levels. These findings suggest that the effects of vitamin B12  
282 on *srh-234* gene expression levels do not appear to depend on *E. coli* modification or its  
283 metabolism.

284

285 To further test whether *Comamonas*-supplied vitamin B12 regulates *srh-234* expression  
286 in ADL neurons, we took advantage of mutant strains of *Comamonas* bacteria that are  
287 deficient in vitamin B12 production, and also fail to reduce expression levels of the  
288 *acdH-1p::gfp* intestinal reporter (**Fig. S2C**). We found that transposon mutations in  
289 genes of the vitamin B12 biosynthetic pathway of *Comamonas* DA1877  $\Delta$ *cbiA* and  
290  $\Delta$ *cbiB* that produce little or no vitamin B12 in these bacteria (Watson et al. 2014), fail at  
291 least in part to reduce *srh-234p::gfp* expression in ADL as observed in DA1877-fed  
292 animals (**Fig. 2C**). Together, these results suggest that vitamin B12 synthesized by  
293 *Comamonas* bacteria regulates the expression of *srh-234* in ADL neurons.

294

### 295 **Propionate overrides the repressing effects of vitamin B12 on *srh-234* expression**

296 Since the balance between vitamin B12 and propionyl-CoA levels involved in propionate  
297 breakdown (**Fig. 3A**) has been reported to control promoter activity of the *acdH-1* gene  
298 (Watson et al. 2016), we next tested whether propionate can also regulate *srh-234*  
299 expression levels. We found that animals fed on an *E. coli* OP50 diet in the presence of  
300 vitamin B12 restored *srh-234p::gfp* expression in ADL neurons to near wild-type levels  
301 when supplemented with excess propionate (**Fig. 3B**). Feeding animals an *E. coli* OP50  
302 diet supplemented with propionate alone did not significantly alter *srh-234p::gfp*  
303 expression levels in ADL (**Fig. 3B**). Thus, similar to the *acdH-1* promoter, excess  
304 propionate can override the repressing effects of vitamin B12 on *srh-234* expression in  
305 ADL neurons.

306

307 Low vitamin B12 diets such as *E. coli* OP50 or genetic perturbation of the canonical  
308 propionate breakdown pathway leads to propionate accumulation and the transcriptional  
309 activation of the propionate shunt pathway (Watson et al. 2013; Watson et al. 2014;  
310 Watson et al. 2016). Since vitamin B12 fails to fully reduce *srh-234* expression levels in  
311 ADL neurons in the presence of excess propionate, we next tested whether propionate  
312 buildup due to genetic perturbations in the canonical and shunt propionate breakdown  
313 pathways (**Fig. 3A**) also lead to changes in *srh-234* promoter activity. As expected, we  
314 found that animals reduce *srh-234p::gfp* expression when fed the vitamin B12-  
315 producing *Comamonas* DA1877, but not in those animals that carry mutations in the  
316 first step of the canonical propionate pathway, *pcca-1* and *pccb-1* (**Fig. 3C, S3A**) or in  
317 propionate shunt pathway genes, *acdH-1* and *hphd-1* (**Fig. 3D, S3B**). Interestingly, *srh-*  
318 *234p::gfp* expression is slightly increased in both *pccb-1* and *pcca-1* mutants fed on the  
319 low vitamin B12 *E. coli* OP50 diet compared to wild-type, possibly in response to a  
320 further accumulation of propionate. Mutations in the methionine/SAM cycle gene, *metr-*



321 1, did not show significant effects on *srh-234p::gfp* expression in ADL compared to wild-  
322 type when fed on *Comamonas* DA1877 (**Fig. 3E**). Together, these results suggest that  
323 *srh-234* expression levels in ADL neurons are repressed by dietary-supplied vitamin  
324 B12 and activated by propionate levels.

325

### 326 **Dietary-supplied vitamin B12 reduces *srh-234* expression through food ingestion**

327 We previously showed that *srh-234* expression is dependent on starvation associated  
328 with a decreased food ingestion of *E. coli* OP50, as well as sensory inputs into ADL  
329 neurons associated with a decreased presence of OP50 food (Gruner et al. 2014). To  
330 test whether vitamin B12 can act as a volatile olfactory chemical to alter levels of *srh-*  
331 *234* expression in ADL, we decided to expose animals expressing *srh-234p::gfp* to  
332 NGM agar plates seeded with *E. coli* OP50 bacteria that were covered with petri-dish  
333 lids containing NGM agar squares soaked with a 1 mM concentration of vitamin B12  
334 (MeCbl) placed above the animals (**Fig. 4A**). In addition, we exposed worms to  
335 *Comamonas* DA1877 which they cannot eat or touch, while feeding *E. coli* OP50, and  
336 vice versa (**Fig. S4A-B**). In both assays, we found that expression levels of *srh-234* in  
337 ADL neurons was not significantly altered when exposed to *Comamonas* bacteria or  
338 vitamin B12, suggesting that vitamin B12 likely does not act as an olfactory chemical  
339 cue released by bacteria to regulate *srh-234* expression in ADL.

340

341 The *tonB* gene encodes a vitamin B12 transporter present in *E. coli* bacteria that allows  
342 these bacteria to import vitamin B12 from the extracellular environment (Bassford et al.  
343 1976; Kadner 1990). When we exposed *C. elegans* to the *E. coli* K12-type BW25113  
344 strain with loss-of-function mutations in *tonB*, animals showed a slightly increased *srh-*  
345 *234p::gfp* expression in ADL neurons compared to animals fed on wild-type *E. coli*  
346 BW25113 (**Fig. 4B**). As with OP50 diets, animals fed on *E. coli* BW25113 supplemented  
347 with either 64 nM AdoCbl or MeCbl significantly reduced *srh-234p::gfp* expression,  
348 which could be suppressed, at least in part, by *tonB* mutations (**Fig. 4B**). These results  
349 suggest that *E. coli* bacteria may likely function as the vehicle for vitamin B12 via the  
350 *tonB* transporter to regulate *srh-234* expression. However, alternate *tonB*-independent  
351 routes may be required as well to regulate *srh-234*. Consistent with food ingestion being  
352 the main vehicle for vitamin B12, we found that aztreonam-treated *Comamonas*  
353 DA1877 that *C. elegans* cannot eat but still smell and touch, partially suppresses the  
354 vitamin B12-mediated reduction of *srh-234* expression (**Fig. S4C**).

355

356 We next tested the role of the MRP-5 vitamin B12 transporter in *srh-234* regulation,  
357 which has been proposed to export vitamin B12 from the intestine to other tissues to  
358 support embryonic development of *C. elegans* (Na et al. 2018). We found that *mrp-5*  
359 mutations did not suppress the vitamin B12-mediated reduction in *srh-234* expression,  
360 although the interpretation of this negative result is confounded by the observation that

361 *mrp-5* mutations strongly reduce *srh-234* expression in ADL when animals were fed the  
362 *E. coli* OP50 diet without vitamin B12 (**Fig. 4C**). Dye-filling of ADL was normal in *mrp-5*  
363 mutants (100% of animals dye-fill, n>25), suggesting that reduced *srh-234* expression in  
364 *mrp-5* mutants is not due to an ADL morphology defect (**Fig. 4D**). Thus, *mrp-5* may  
365 have additional yet unknown roles in *srh-234* regulation on the OP50 diet.

366  
367 In summary, these data suggest that rather than directly sensing vitamin B12 levels, it is  
368 more likely that dietary-supplied vitamin B12 ingested by *C. elegans* regulates *srh-234*  
369 expression levels in ADL neurons.

370  
371 **MEF-2 is required for the vitamin B12-mediated reduction in *srh-234* expression**  
372 To further interrogate the mechanisms underlying the vitamin B12-dependent regulation  
373 of *srh-234* gene expression in ADL neurons, we examined candidate components and  
374 pathways. We previously reported that the MEF-2 transcription factor acts together with  
375 bHLH factors to regulate the starvation-dependent regulation of *srh-234* expression  
376 (Gruner et al. 2016). In this mechanism, MEF-2 acts cell-autonomously with bHLH  
377 factors HLH-2/HLH-3 in ADL neurons, while HLH-30 and MLX-3 bHLH factors function  
378 in the intestine to non-cell-autonomously regulate *srh-234* expression in ADL in  
379 response to starvation signals. We found that a mutation in *mef-2* but not in *hlh-30* can  
380 fully suppress the vitamin B12-dependent reduction in *srh-234* expression when animals  
381 were fed a *Comamonas* DA1877 diet, suggesting that MEF-2 is required for the vitamin  
382 B12-dependent regulation of *srh-234* (**Fig. 5A, S5A**).

383  
384 Since the *srh-234* cis-regulatory region contains a MEF-2 binding site (**Fig. S5B**), which  
385 is required to repress but not to promote *srh-234* expression in starved conditions  
386 (Gruner et al. 2014), we examined whether this MEF-2 binding site was sufficient for the  
387 vitamin B12-dependent regulation of *srh-234* expression. To test this, we used a  
388 transgenic reporter strain of the *sre-1* promoter fused to *gfp* with or without the MEF-2  
389 binding site identified in the *srh-234* promoter. The *sre-1* promoter is specifically and  
390 highly expressed in ADL neurons, but levels of *sre-1* expression are not changed by  
391 vitamin B12 (**Fig. S1D, 1E**). Surprisingly, we found that animals carrying a transgene of  
392 the *sre-1* promoter with the inserted MEF-2 site (*sre-1p(+MEF2)::gfp*) showed similar  
393 *sre-1* expression levels in ADL when fed *Comamonas* DA1877 compared to wild-type  
394 *sre-1p::gfp* animals (*sre-1p(WT)::gfp*) on the same diet (**Fig. 5B**). These results suggest  
395 that in contrast to the starvation-dependent regulation of *srh-234* (Gruner et al. 2014),  
396 insertion of the MEF2 binding site alone is not sufficient for the vitamin B12-dependent  
397 regulation of *srh-234* expression levels in ADL neurons, suggesting the requirement of  
398 another yet unknown factor that may act together with MEF-2 (**Fig. 5C**). Together, these  
399 findings show that the function of the MEF-2 transcription factor is necessary for  
400 regulation of *srh-234* mediated by dietary-supplied vitamin B12.

## 401 DISCUSSION

402 In this study, we show that the expression levels of the *srh-234* chemoreceptor gene in  
403 the ADL sensory neuron type is regulated by dietary vitamin B12. In a low vitamin B12  
404 *E. coli* diet, *srh-234* is highly expressed in ADL but not when *C. elegans* is fed a high  
405 vitamin B12-producing *Comamonas* diet (**Fig. 6**). This vitamin B12-mediated regulation  
406 of *srh-234* expression levels is dependent on the MEF-2 transcription factor. The  
407 mechanisms by which dietary vitamin B12 transcriptionally tunes *srh-234* could provide  
408 *C. elegans* the means to modify long-term changes in ADL-mediated responses.

409  
410 This study complements our previous work (Gruner et al. 2014; Gruner et al. 2016),  
411 which explored the dynamics in *srh-234* expression upon starvation, which was  
412 dependent on MEF-2 function and its respective MEF2 binding site present in the *cis*-  
413 regulatory sequence of *srh-234*. Similarly, we show that loss-of-function *mef-2*  
414 mutations can suppress *srh-234* expression in ADL in response to feeding the vitamin  
415 B12-producing *Comamonas* bacteria, suggesting that MEF-2 has dual roles in  
416 regulating *srh-234* expression in response to both starvation and dietary vitamin B12.  
417 However, unlike starvation (Gruner et al. 2016), artificial introduction of the *srh-234*  
418 MEF2 binding site into the *cis*-regulatory sequence of the *sre-1* gene close to its ADL E-  
419 box site (McCarroll et al. 2005) did not confer vitamin B12-induced downregulation via  
420 MEF-2. Based on these findings, we propose a model (**Fig. 6**) in which animals fed a  
421 high vitamin B12 *Comamonas* diet reduce *srh-234* expression via a transcriptional  
422 module consisting of a MEF-2 factor and its respective MEF2 binding site, together with  
423 a yet unknown factor (X) stimulated by dietary vitamin B12. This in turn may repress  
424 bHLH factors through an E-box site that promotes *srh-234* in ADL neurons via a  
425 complex mechanism involving a combination of different bHLH heterodimer pairs  
426 (Gruner et al. 2016). When animals are fed a low vitamin B12 diet of *E. coli* OP50, MEF-  
427 2 activity no longer represses *srh-234* expression in ADL. Thus, MEF-2 activity is  
428 necessary for proper *srh-234* regulation in response to dietary-supplied vitamin B12, but  
429 the exact pathways by which vitamin B12 modulates *srh-234* remains to be discovered.

430  
431 Our results also show that supplementing exogenous propionate to a *E. coli* OP50 diet,  
432 and mutations in the canonical (*pcca-1*, *pccb-1*) and shunt propionate (*acd-1*, *hphd-1*)  
433 breakdown pathways, are able to override the repressing effects of vitamin B12 on *srh*-  
434 *234* expression. This may suggest that a toxic build-up of propionate levels in *C.*  
435 *elegans* regulates *srh-234* expression in ADL neurons, and that the balance between  
436 vitamin B12 and propionate levels is important for tuning the promoter activity of *srh*-  
437 *234*. In mammalian models of propionic acidemia, animals lacking the propionyl CoA-  
438 carboxylase (PCCA) were found to have elevated propionate levels shortly after birth  
439 (Miyazaki et al. 2001). Similarly, *pcca-1* mutant animals in *C. elegans* may have  
440 naturally elevated propionate levels that cannot be restored to normal levels by vitamin

441 B12 sufficient diets alone (Watson et al. 2016). Consistent with a persistent  
442 accumulation of propionate in *C. elegans* modulating *srh-234* promoter activity, we  
443 show that *pcca-1* and *pccb-1* mutants significantly enhance the levels of *srh-234*  
444 expression on a *E. coli* OP50 diet that is unable to efficiently breakdown propionate by  
445 the canonical pathway. Conversely, *srh-234* expression levels are strongly reduced in  
446 ADL when exposed to low propionate levels; for instance, in animals that are food  
447 deprived (starved) or exposed to high vitamin B12 conditions. Studies in rats  
448 demonstrated that after two days of starvation, propionate levels are rapidly decreased  
449 but again restored after re-feeding (Illman et al. 1986).

450  
451 The nociceptive ADL neuron where *srh-234* is specifically expressed mediates  
452 avoidance responses to a wide variety of environmental signals such as odors (Chao et  
453 al. 2004; Troemel et al. 1995; Troemel et al. 1997), pheromones (Jang et al. 2012), and  
454 heavy metals (Sambongi et al. 1999; Wen et al. 2020). Since chemoreceptor genes  
455 expressed in a specific chemosensory neuron type are generally linked to a common  
456 chemical response determined by the identity of the neuron in *C. elegans*, with a few  
457 exceptions in which neurons switch their preference towards odors (Tsunozaki et al.  
458 2008), it is probable that the *srh-234* chemoreceptor may detect aversive chemical  
459 stimuli perceived by ADL. Interestingly, vitamin B12 in mammals has anti-nociceptive  
460 properties (Erfanparast et al. 2014), and the activity of certain olfactory receptors in  
461 tissues other than neurons can respond to propionate (Pluznick et al. 2013), which is a  
462 metabolic byproduct produced by gut bacteria in mammals (Morrison and Preston  
463 2016). It is therefore tempting to speculate that vitamin B12 obtained through ingestion  
464 alters ADL-mediated nociceptive responses by changing the expression of individual  
465 chemoreceptor genes such as *srh-234*. However, nothing is known about whether  
466 vitamin B12 or propionate levels affects ADL-mediated responses in *C. elegans*. Other  
467 than growth, development, and lifespan (Bito et al. 2013; MacNeil et al. 2013), only  
468 recently vitamin B12 in the diet has been shown to be an important micronutrient in the  
469 regulation of predatory behaviors between nematodes (Akduman et al. 2020). In  
470 support of a model by which dietary vitamin B12 absorbed by the *C. elegans* intestine  
471 regulates *srh-234*, our previous work (Gruner et al. 2016) demonstrated that an  
472 intestine-to-ADL interaction is necessary to regulate *srh-234* expression as a function of  
473 feeding state. This communication between the intestine and the ADL neuron involves  
474 the action of non-cell-autonomous pathways including insulin-like peptides and *hlh-*  
475 *30/mxl-3* bHLH factors. We show that vitamin B12-mediated regulation of *srh-234* is not  
476 dependent on *hlh-30* function, suggesting that further research is needed to investigate  
477 how dietary vitamin B12 regulates *srh-234* expression in ADL neurons.

478  
479 The *srh-234* chemoreceptor gene is one of a large repertoire of over 1,300  
480 chemoreceptor genes (Robertson 2000), many of which are localized in a relatively

481 small subset of chemosensory neurons (Vidal et al. 2018), such that each neuron  
482 expresses multiple chemoreceptor genes. We show here dynamic changes in the  
483 expression levels of the *srh-234* chemoreceptor gene localized in the ADL sensory  
484 neuron type in response to changing dietary vitamin B12. Other studies have illustrated  
485 that dynamic expression changes in individual chemoreceptor genes can have profound  
486 effects on behavioral outcomes. For instance, changes in the expression levels of the  
487 *odr-10* olfactory receptor required to sense diacetyl (Sengupta et al. 1996) in the male  
488 *C. elegans* contributes to its plasticity in food detection and feeding/exploration  
489 decisions in order to locate mates (Ryan et al. 2014). Further research will determine  
490 what the functional consequences are of the plasticity in *srh-234* chemoreceptor gene  
491 expression in ADL neurons in response to dietary vitamin B12.

492

#### 493 **DATA AVAILABILITY**

494 All data are available as part of this manuscript and are posted on the Open Science  
495 Framework (will be deposited). Supplemental data and information are available online.

496

#### 497 **ACKNOWLEDGEMENTS**

498 We thank Marian Walhout, the Keio Knockout collection, and the *E. coli* Genetic Stock  
499 Center for bacterial strains. We thank Dong Yan for the *mrp-5* mutant strain. We thank  
500 the *Caenorhabditis elegans* Center, which is funded by the National Institutes of Health  
501 Office of Research Infrastructure Programs (P40 OD010440), for both *C. elegans* and  
502 bacterial strains. We also thank the Cellular and Molecular Imaging Core facility of the  
503 COBRE Integrative Neuroscience Center at the University of Nevada for providing  
504 equipment and resources.

505

#### 506 **FUNDING**

507 This work was supported by the National Science Foundation grant IOS 1353014 to  
508 A.M.V., and the National Institutes of Health grant R01 NS107969 to A.M.V. Research  
509 reported in this work used the Cellular and Molecular Imaging (CMI) core facility  
510 supported by the National Institute of General Medical Sciences of the National  
511 Institutes of Health grant P20 GM103650.

512

#### 513 **CONFLICTS OF INTEREST**

514 None declared.

515

#### 516 **LITERATURE CITED**

517

518 Akduman, N., J.W. Lightfoot, W. Roseler, H. Witte, W.S. Lo *et al.*, 2020 Bacterial  
519 vitamin B12 production enhances nematode predatory behavior. *ISME J* 14  
520 (6):1494-1507.

- 521 Bassford, P.J., Jr., C. Bradbeer, R.J. Kadner, and C.A. Schnaitman, 1976 Transport of  
522 vitamin B12 in tonB mutants of Escherichia coli. *J Bacteriol* 128 (1):242-247.
- 523 Bito, T., Y. Matsunaga, Y. Yabuta, T. Kawano, and F. Watanabe, 2013 Vitamin B12  
524 deficiency in *Caenorhabditis elegans* results in loss of fertility, extended life cycle,  
525 and reduced lifespan. *FEBS Open Bio* 3:112-117.
- 526 Brenner, S., 1974 The genetics of *Caenorhabditis elegans*. *Genetics* 77 (1):71-94.
- 527 Chao, M.Y., H. Komatsu, H.S. Fukuto, H.M. Dionne, and A.C. Hart, 2004 Feeding status  
528 and serotonin rapidly and reversibly modulate a *Caenorhabditis elegans*  
529 chemosensory circuit. *Proc Natl Acad Sci U S A* 101 (43):15512-15517.
- 530 Coolon, J.D., K.L. Jones, T.C. Todd, B.C. Carr, and M.A. Herman, 2009 *Caenorhabditis*  
531 *elegans* genomic response to soil bacteria predicts environment-specific genetic  
532 effects on life history traits. *PLoS Genet* 5 (6):e1000503.
- 533 Erfanparast, A., M. Escort, E. Tamaddonfard, S. Maroufi, S. Kazemi-Shojaei *et al.*, 2014  
534 Systemic and local peripheral injections of vitamin B12 suppressed orofacial  
535 nociception induced by formalin in rats. *Drug Res (Stuttg)* 64 (2):85-90.
- 536 Fox, A.N., R.J. Pitts, H.M. Robertson, J.R. Carlson, and L.J. Zwiebel, 2001 Candidate  
537 odorant receptors from the malaria vector mosquito *Anopheles gambiae* and  
538 evidence of down-regulation in response to blood feeding. *Proc Natl Acad Sci U*  
539 *S A* 98 (25):14693-14697.
- 540 Gracida, X., and C.R. Eckmann, 2013 Fertility and germline stem cell maintenance  
541 under different diets requires *nhr-114/HNF4* in *C. elegans*. *Curr Biol* 23 (7):607-  
542 613.
- 543 Gruner, M., J. Grubbs, A. McDonagh, D. Valdes, A. Winbush *et al.*, 2016 Cell-  
544 Autonomous and Non-Cell-Autonomous Regulation of a Feeding State-  
545 Dependent Chemoreceptor Gene via MEF-2 and bHLH Transcription Factors.  
546 *PLoS Genet* 12 (8):e1006237.
- 547 Gruner, M., D. Nelson, A. Winbush, R. Hintz, L. Ryu *et al.*, 2014 Feeding state, insulin  
548 and NPR-1 modulate chemoreceptor gene expression via integration of sensory  
549 and circuit inputs. *PLoS Genet* 10 (10):e1004707.
- 550 Gruner, M., and A. van der Linden, 2015 Plasticity of chemoreceptor gene expression:  
551 Sensory and circuit inputs modulate state-dependent chemoreceptors. *Worm*  
552 Volume 4 (Issue 2).
- 553 Hallem, E.A., A. Nicole Fox, L.J. Zwiebel, and J.R. Carlson, 2004 Olfaction: mosquito  
554 receptor for human-sweat odorant. *Nature* 427 (6971):212-213.
- 555 Illman, R.J., D.L. Topping, and R.P. Trimble, 1986 Effects of food restriction and  
556 starvation-refeeding on volatile fatty acid concentrations in the rat. *J Nutr* 116  
557 (9):1694-1700.
- 558 Jang, H., K. Kim, S.J. Neal, E. Macosko, D. Kim *et al.*, 2012 Neuromodulatory state and  
559 sex specify alternative behaviors through antagonistic synaptic pathways in *C.*  
560 *elegans*. *Neuron* 75 (4):585-592.
- 561 Kadner, R.J., 1990 Vitamin B12 transport in *Escherichia coli*: energy coupling between  
562 membranes. *Mol Microbiol* 4 (12):2027-2033.
- 563 Khan, M.A.M., N.P. Deshpande, L.A. Shuttleworth, T. Osborne, D. Collins *et al.*, 2021  
564 Raspberry ketone diet supplement reduces attraction of sterile male Queensland  
565 fruit fly to cuedure by altering expression of chemoreceptor genes. *Sci Rep* 11  
566 (1):17632.

- 567 MacNeil, L.T., E. Watson, H.E. Arda, L.J. Zhu, and A.J. Walhout, 2013 Diet-induced  
568 developmental acceleration independent of TOR and insulin in *C. elegans*. *Cell*  
569 153 (1):240-252.
- 570 McCarroll, S.A., H. Li, and C.I. Bargmann, 2005 Identification of transcriptional  
571 regulatory elements in chemosensory receptor genes by probabilistic  
572 segmentation. *Curr Biol* 15 (4):347-352.
- 573 Meisel, J.D., O. Panda, P. Mahanti, F.C. Schroeder, and D.H. Kim, 2014  
574 Chemosensation of bacterial secondary metabolites modulates neuroendocrine  
575 signaling and behavior of *C. elegans*. *Cell* 159 (2):267-280.
- 576 Miyazaki, T., T. Ohura, M. Kobayashi, Y. Shigematsu, S. Yamaguchi *et al.*, 2001 Fatal  
577 propionic acidemia in mice lacking propionyl-CoA carboxylase and its rescue by  
578 postnatal, liver-specific supplementation via a transgene. *J Biol Chem* 276  
579 (38):35995-35999.
- 580 Morrison, D.J., and T. Preston, 2016 Formation of short chain fatty acids by the gut  
581 microbiota and their impact on human metabolism. *Gut Microbes* 7 (3):189-200.
- 582 Na, H., O. Ponomarova, G.E. Giese, and A.J.M. Walhout, 2018 *C. elegans* MRP-5  
583 Exports Vitamin B12 from Mother to Offspring to Support Embryonic  
584 Development. *Cell Rep* 22 (12):3126-3133.
- 585 Pluznick, J.L., R.J. Protzko, H. Gevorgyan, Z. Peterlin, A. Sipos *et al.*, 2013 Olfactory  
586 receptor responding to gut microbiota-derived signals plays a role in renin  
587 secretion and blood pressure regulation. *Proc Natl Acad Sci U S A* 110  
588 (11):4410-4415.
- 589 Pradel, E., Y. Zhang, N. Pujol, T. Matsuyama, C.I. Bargmann *et al.*, 2007 Detection and  
590 avoidance of a natural product from the pathogenic bacterium *Serratia*  
591 *marcescens* by *Caenorhabditis elegans*. *Proc Natl Acad Sci U S A* 104 (7):2295-  
592 2300.
- 593 Revtovich, A.V., R. Lee, and N.V. Kirienko, 2019 Interplay between mitochondria and  
594 diet mediates pathogen and stress resistance in *Caenorhabditis elegans*. *PLoS*  
595 *Genet* 15 (3):e1008011.
- 596 Rinker, D.C., R.J. Pitts, X. Zhou, E. Suh, A. Rokas *et al.*, 2013 Blood meal-induced  
597 changes to antennal transcriptome profiles reveal shifts in odor sensitivities in  
598 *Anopheles gambiae*. *Proc Natl Acad Sci U S A* 110 (20):8260-8265.
- 599 Robertson, H.M., 2000 The large *srh* family of chemoreceptor genes in *Caenorhabditis*  
600 nematodes reveals processes of genome evolution involving large duplications  
601 and deletions and intron gains and losses. *Genome Res* 10 (2):192-203.
- 602 Ryan, D.A., R.M. Miller, K. Lee, S.J. Neal, K.A. Fagan *et al.*, 2014 Sex, age, and hunger  
603 regulate behavioral prioritization through dynamic modulation of chemoreceptor  
604 expression. *Curr Biol* 24 (21):2509-2517.
- 605 Sambongi, Y., T. Nagae, Y. Liu, T. Yoshimizu, K. Takeda *et al.*, 1999 Sensing of  
606 cadmium and copper ions by externally exposed ADL, ASE, and ASH neurons  
607 elicits avoidance response in *Caenorhabditis elegans*. *Neuroreport* 10 (4):753-  
608 757.
- 609 Sengupta, P., 2012 The belly rules the nose: feeding state-dependent modulation of  
610 peripheral chemosensory responses. *Curr Opin Neurobiol.*

- 611 Sengupta, P., J.H. Chou, and C.I. Bargmann, 1996 odr-10 encodes a seven  
612 transmembrane domain olfactory receptor required for responses to the odorant  
613 diacetyl. *Cell* 84 (6):899-909.
- 614 Shtonda, B.B., and L. Avery, 2006 Dietary choice behavior in *Caenorhabditis elegans*. *J*  
615 *Exp Biol* 209 (Pt 1):89-102.
- 616 Taparia, T., R. Ignell, and S.R. Hill, 2017 Blood meal induced regulation of the  
617 chemosensory gene repertoire in the southern house mosquito. *BMC Genomics*  
618 18 (1):393.
- 619 Troemel, E.R., J.H. Chou, N.D. Dwyer, H.A. Colbert, and C.I. Bargmann, 1995  
620 Divergent seven transmembrane receptors are candidate chemosensory  
621 receptors in *C. elegans*. *Cell* 83 (2):207-218.
- 622 Troemel, E.R., B.E. Kimmel, and C.I. Bargmann, 1997 Reprogramming chemotaxis  
623 responses: sensory neurons define olfactory preferences in *C. elegans*. *Cell* 91  
624 (2):161-169.
- 625 Tsunozaki, M., S.H. Chalasani, and C.I. Bargmann, 2008 A behavioral switch: cGMP  
626 and PKC signaling in olfactory neurons reverses odor preference in *C. elegans*.  
627 *Neuron* 59 (6):959-971.
- 628 Vidal, B., U. Aghayeva, H. Sun, C. Wang, L. Glenwinkel *et al.*, 2018 An atlas of  
629 *Caenorhabditis elegans* chemoreceptor expression. *PLoS Biol* 16 (1):e2004218.
- 630 Watson, E., L.T. MacNeil, H.E. Arda, L.J. Zhu, and A.J.M. Walhout, 2013 Integration of  
631 metabolic and gene regulatory networks modulates the *C. elegans* dietary  
632 response. *Cell* 153 (1):253-266.
- 633 Watson, E., L.T. MacNeil, A.D. Ritter, L.S. Yilmaz, A.P. Rosebrock *et al.*, 2014  
634 Interspecies Systems Biology Uncovers Metabolites Affecting *C. elegans* Gene  
635 Expression and Life History Traits. *Cell* 156 (6):1336-1337.
- 636 Watson, E., V. Olin-Sandoval, M.J. Hoy, C.H. Li, T. Lousse *et al.*, 2016 Metabolic  
637 network rewiring of propionate flux compensates vitamin B12 deficiency in *C.*  
638 *elegans*. *Elife* 5.
- 639 Wen, X., Y.H. Chen, R. Li, M.H. Ge, S.W. Yin *et al.*, 2020 Signal Decoding for  
640 Glutamate Modulating Egg Laying Oppositely in *Caenorhabditis elegans* under  
641 Varied Environmental Conditions. *iScience* 23 (10):101588.
- 642 Yilmaz, L.S., and A.J. Walhout, 2014 Worms, bacteria, and micronutrients: an elegant  
643 model of our diet. *Trends Genet* 30 (11):496-503.
- 644 Zhang, J., A.D. Holdorf, and A.J. Walhout, 2017 *C. elegans* and its bacterial diet as a  
645 model for systems-level understanding of host-microbiota interactions. *Curr Opin*  
646 *Biotechnol* 46:74-80.
- 647



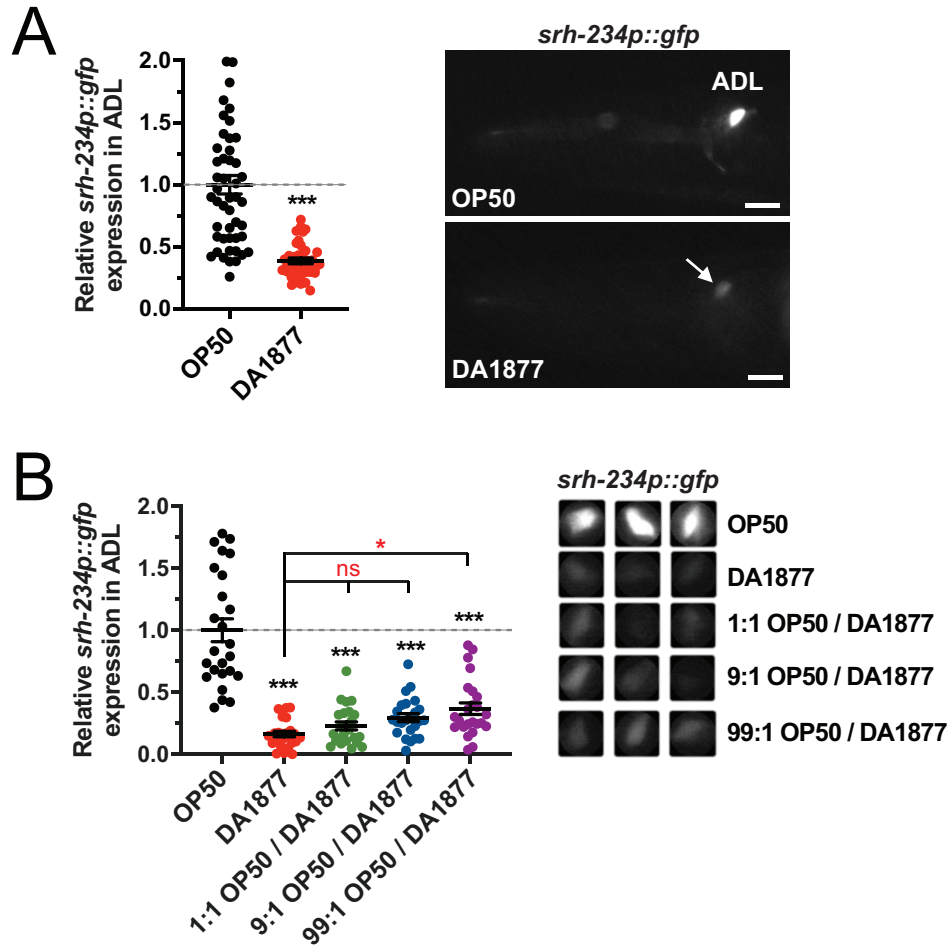

648

649

650 **Fig. 1: Expression of *srh-234* is downregulated by a *Comamonas* DA1877 diet.**  
 651 **(A)** Relative expression levels of *srh-234p::gfp* in the ADL cell body of adults fed either  
 652 an *E. coli* OP50 diet or a *Comamonas* DA1877 diet. Adult animals containing stably  
 653 integrated copies of a *srh-234p::gfp* transgene (*oyls56*) were examined at the same  
 654 exposure time on both diets. Images are lateral views of the ADL sensory neuron. Scale  
 655 is 15  $\mu$ m. Data are represented as the mean  $\pm$  SEM ( $n > 38$  animals for each diet). \*\*\*

656  $p < 0.001$  by an unpaired 2-tailed *t*-test. **(B)** Relative expression levels of *srh-234* in the  
 657 ADL cell body of adult animals fed each of the indicated diets. OP50: *E. coli*; DA1877  
 658 *Comamonas*; 1:1, 9:1 and 99:1 refers to the dilution of *Comamonas* DA1877 in *E. coli*  
 659 OP50. Bacteria were seeded on peptone-free plates to prevent bacterial growth (see  
 660 Material and Methods). Right panel: Representative cropped images of *srh-234p::gfp*  
 661 expression in the ADL cell body with the indicated diets and dilutions. Images were  
 662 acquired at the same exposure time. Data are represented as the mean  $\pm$  SEM ( $n > 24$   
 663 animals for each condition). \*\*\* indicates values that are different from wild-type animals  
 664 fed on *E. coli* OP50 at  $p < 0.001$  by a Kruskal-Wallis with Dunn multiple-comparisons  
 test.

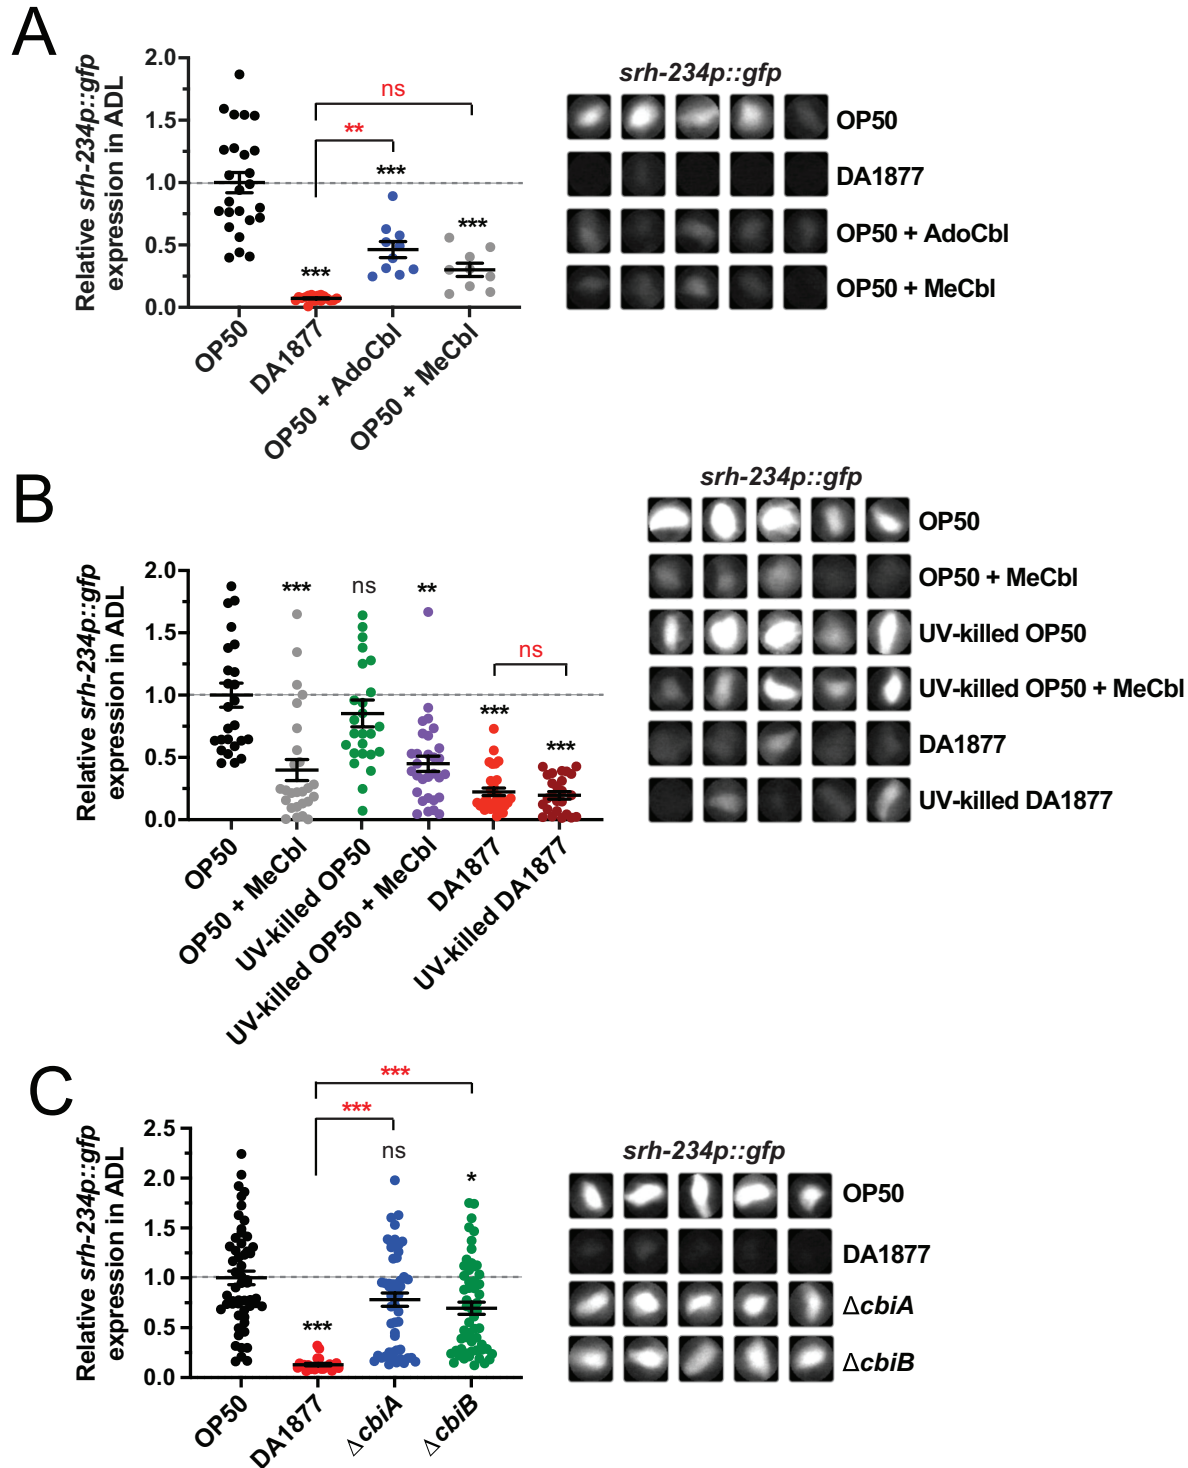

665  
666 **Fig. 2: Vitamin B12 produced by *Comamonas* is required to downregulate *srh-234***  
667 **expression.**

668 (A) Relative expression of *srh-234p::gfp* in the ADL cell body of OP50-fed adult animals  
669 supplemented with either AdoCbl or MeCbl compounds at a 64 nM final concentration.

670 Data are represented as the mean  $\pm$  SEM (n>9 animals for each condition). \*\*\*, \*\*

671 indicates values that are different from wild-type fed on *E. coli* OP50 or *Comamonas*

672 DA1877 at  $p < 0.001$  and  $p < 0.01$ , respectively, by a one-way ANOVA with Tukey  
673 multiple-comparisons test. **(B)** Relative *srh-234* expression in the ADL cell body of  
674 animals fed either live or UV-irradiated killed *E. coli* OP50 and *Comamonas* DA1877  
675 diets. Data are represented as the mean  $\pm$  SEM ( $n > 26$  animals for each condition). \*\*\*,  
676 \*\* indicates values that are different from wild-type animals fed on *E. coli* OP50 or  
677 *Comamonas* DA1877 at  $p < 0.001$  and  $p < 0.01$ , respectively by a Kruskal-Wallis with  
678 Dunn multiple-comparisons test. **(C)** Relative expression of *srh-234* in the ADL cell body  
679 of adults fed the *Comamonas* mutant strains  $\Delta cbiA$  and  $\Delta cbiB$  defective in producing  
680 vitamin B12 diets compared to *E. coli* OP50 and *Comamonas* DA1877. Data are  
681 represented as the mean  $\pm$  SEM ( $n = 24-56$  animals for each diet). \*\*\*  $p < 0.001$ , \*\*  $p < 0.01$   
682 by a Kruskal-Wallis with Dunn multiple-comparisons test. **(A-C)** Right panels:  
683 Representative cropped images of *srh-234p::gfp* expression in the ADL cell body with  
684 the indicated compounds, genotypes and/or conditions. Images were acquired at the  
685 same exposure time. ns, not significant.

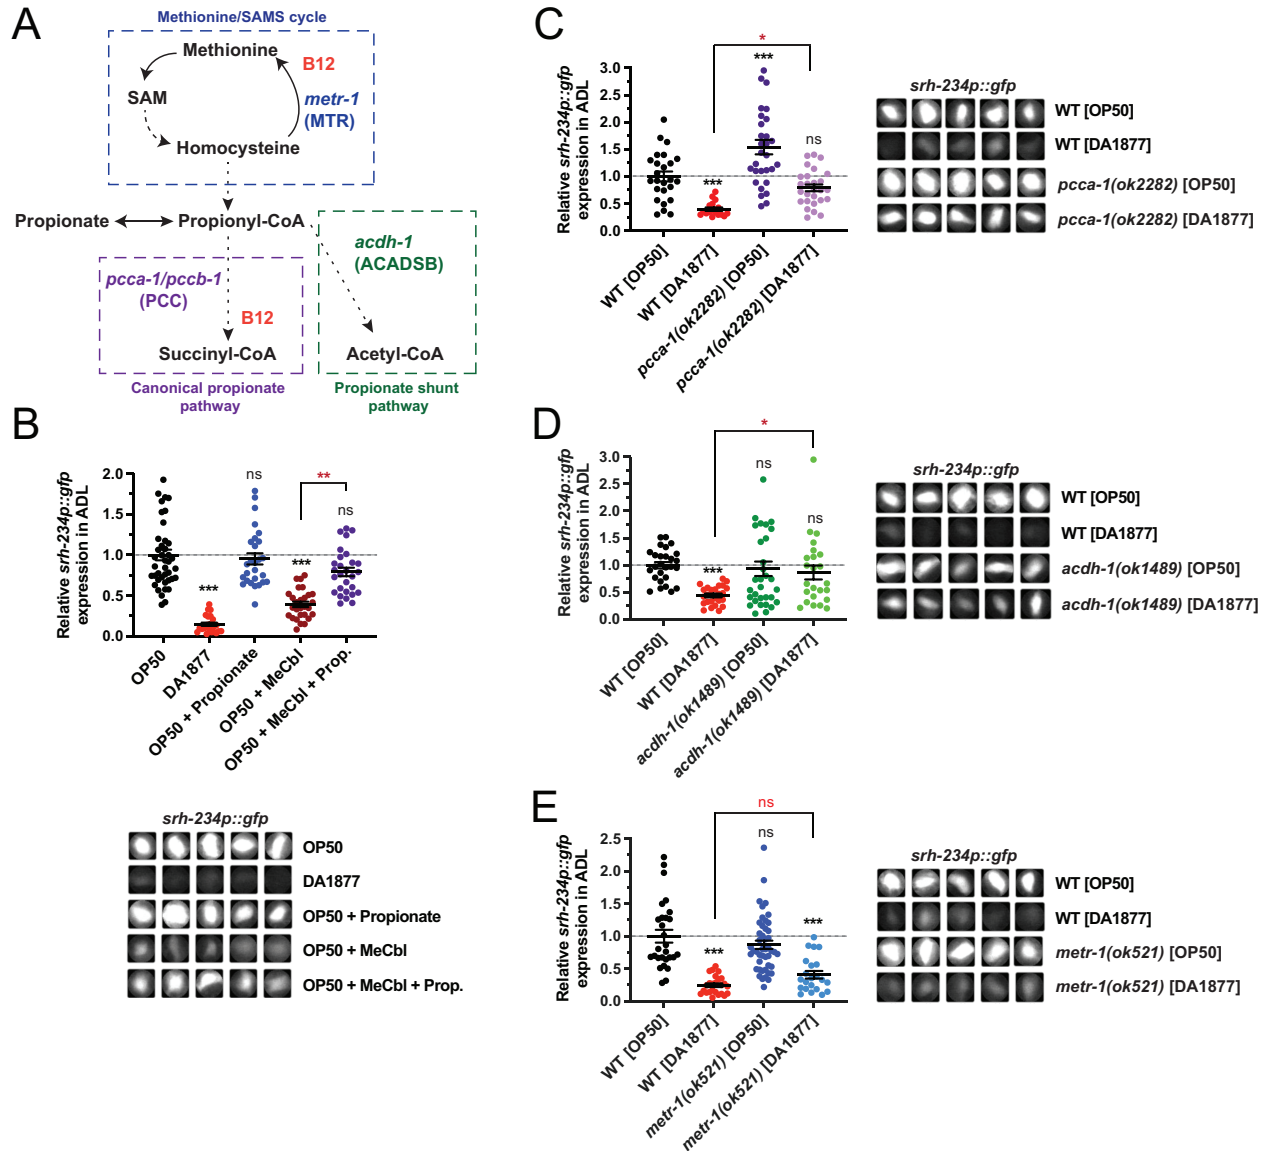

686  
687  
688  
689  
690  
691  
692  
693  
694  
695  
696  
697  
698  
699  
700  
701

**Fig. 3: Downregulation of *srh-234* expression by vitamin B12 is reversed by propionate accumulation.**

(A) Schematic of the *C. elegans* methionine/SAMs cycle (blue dotted box), canonical propionate breakdown pathway (purple dotted box), and the propionate shunt metabolic pathway (green dotted box). (B) Relative expression of *srh-234p::gfp* in the ADL cell body of adults fed an *E. coli* OP50 diet supplemented with excess propionate (40 mM final concentration) and/or MeCbl (64 nM final concentration). Data are represented as the mean  $\pm$  SEM (n=24-42 animals for each condition). \*\*\*, \*\* indicates values that are different from wild-type fed on *E. coli* OP50 or *Comamonas* DA1877 at  $p < 0.001$  and  $p < 0.01$ , respectively, by a one-way ANOVA with Tukey multiple-comparisons test. (C-E) Relative expression of *srh-234p::gfp* in the ADL cell body of adult animals with mutations in the canonical propionate breakdown pathway (C), the propionate shunt breakdown pathway (D), and the methionine/SAM cycle (E) fed either *E. coli* OP50 or *Comamonas* DA1877 diets. Data are represented as the mean  $\pm$  SEM. n>18 animals for each diet and genotype. (C) \*\*\*, \* indicates values that are different from wild-type fed

702 on *E. coli* OP50 or *Comamonas* DA1877 at  $p < 0.001$  and  $p < 0.05$ , respectively, by a one-  
703 way ANOVA with Tukey multiple-comparisons test. **(D-E)** \*\*\*  $p < 0.001$ , \*  $p < 0.05$  by a  
704 Kruskal-Wallis with Dunn multiple-comparisons test. **(B-E)** Images were acquired at the  
705 same exposure time. ns, not significant.

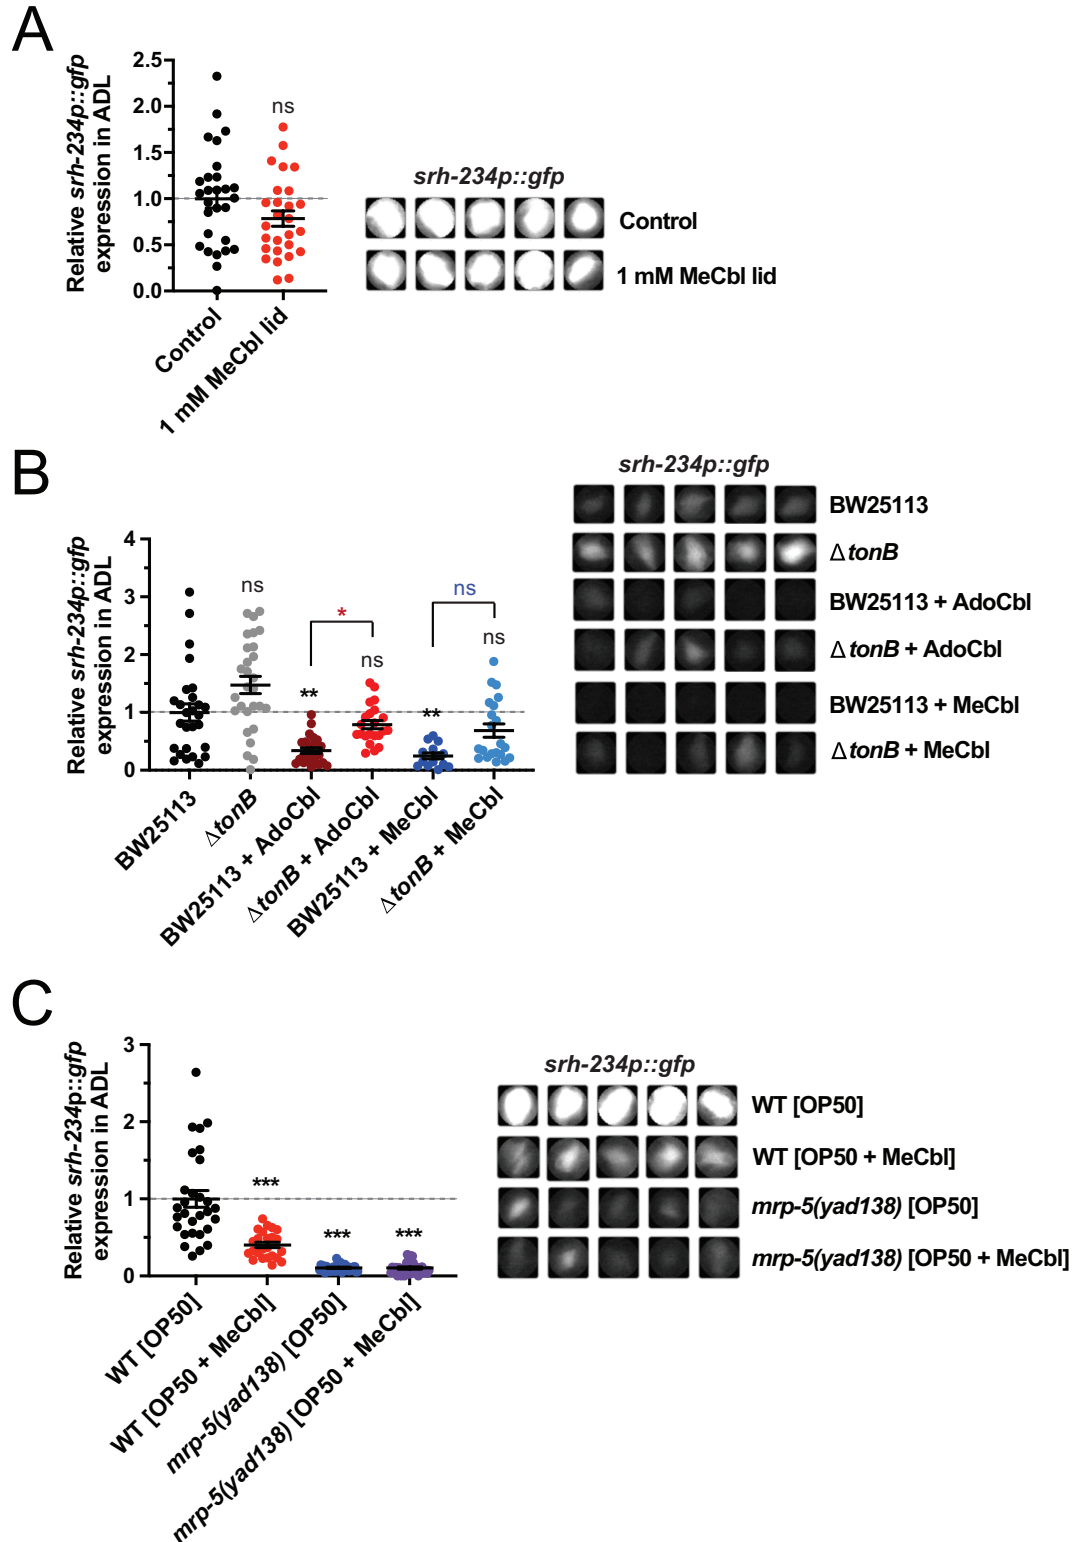

706  
707  
708  
709  
710

**Fig. 4: Bacterial vitamin B12 uptake regulates *srh-234* expression.**

(A) Relative expression of *srh-234p::gfp* in the ADL cell body of adult animals fed on OP50 diets on NGM agar plates covered with lids containing 1 mM MeCbl. Data are represented as the mean  $\pm$  SEM ( $n > 25$  animals). ns, not significant by an unpaired 2-

711 tailed *t*-test. **(B)** Relative expression of *srh-234p::gfp* in the ADL cell body of adults fed  
712 the *E. coli*  $\Delta$ *tonB* mutant (strain JW5195) compared to its parental wild-type strain  
713 (BW25113) supplemented with or without AdoCbl and MeCbl (64 nm final  
714 concentrations). Data are represented as the mean  $\pm$  SEM (n=14-28 animals for each  
715 condition). \*\* indicates values that are different from wild-type fed on *E. coli* OP50 or  
716 *Comamonas* DA1877 at  $p < 0.01$  by a Kruskal-Wallis test with Dunn multiple-  
717 comparisons test. Of note, *srh-234p::gfp* is weakly expressed on an *E. coli* BW25113  
718 diet. **(C)** Relative expression of *srh-234p::gfp* in the ADL cell body of *mrp-5* mutants fed  
719 on *E. coli* OP50 diets supplemented with MeCbl (64 nM final concentration) compared  
720 to wild-type. Data are represented as the mean  $\pm$  SEM (n>24 animals). \*\*\* indicates  
721 values that are different from wild-type fed on *E. coli* OP50 at  $p < 0.001$  by a Kruskal-  
722 Wallis test with Dunn multiple-comparisons test. **(A-C)** Right panels: Representative  
723 cropped images of *srh-234p::gfp* expression in the ADL cell body with the indicated  
724 compounds, genotypes and/or conditions. ns, not significant.

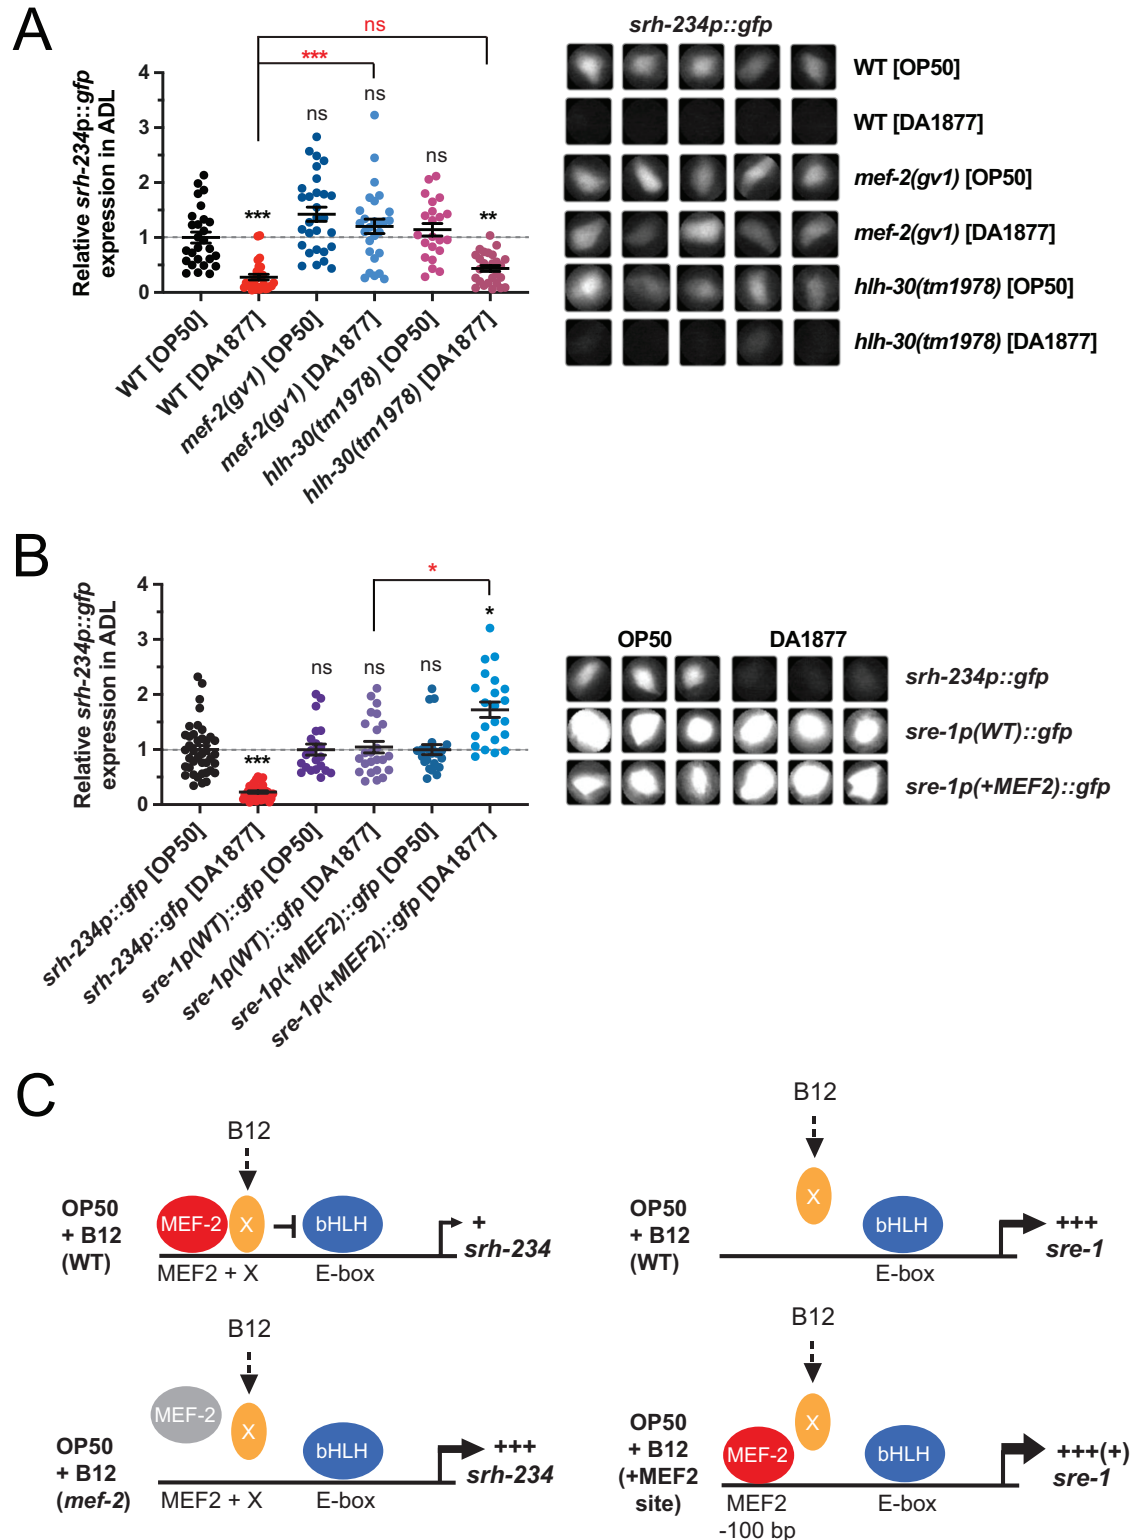

725  
726  
727  
728  
729

**Fig. 5: *mef-2* is required for vitamin B12-dependent regulation of *srh-234*.**  
(A) Relative expression of *srh-234p::gfp* in the ADL cell body of *mef-2* and *hlh-30* mutants when adults are fed on *Comamonas* DA1877 compared to *E. coli* OP50 diets. Data are represented as the mean  $\pm$  SEM ( $n > 22$  animals). ns, not significant. \*\*\*, \*\*



730 indicates values that are different from wild-type fed on *E. coli* OP50 or *Comamonas*  
731 DA1877 at  $p < 0.001$  and  $p < 0.01$ , respectively, by a Kruskal-Wallis test with Dunn  
732 multiple-comparisons test. Right panel: Representative cropped images of *srh-234p::gfp*  
733 expression in the ADL cell body with the indicated genotypes and diet conditions.  
734 Images were acquired at the same but lower exposure time. **(B)** Relative expression of  
735 wild-type *sre-1p::gfp* (*sre-1p(WT)::gfp*) or the *sre-1* promoter with the inserted MEF2  
736 binding site sequence (*sre-1p(+MEF2)::gfp*) in the ADL cell body of adults fed on  
737 *Comamonas* DA1877 compared to an *E. coli* OP50 diet. Data are represented as the  
738 mean  $\pm$  SEM (n=21-40 animals). ns, not significant. \*\*\*, \* indicates values that are  
739 different from wild-type fed on *E. coli* OP50 or *Comamonas* DA1877 at  $p < 0.001$  and  
740  $p < 0.05$ , respectively, by a Kruskal-Wallis test with Dunn multiple-comparisons test. For  
741 *sre-1* expression, data were normalized to the *sre-1p::gfp* reporter fed on *E. coli* OP50.  
742 For *srh-234* expression, data were normalized to *srh-234p::gfp* fed on *E. coli* OP50.  
743 Right panel: Representative cropped images of *srh-234* or *sre-1* expression in the ADL  
744 cell body with the indicated diet conditions. **(C)** Model based on findings shown in panel  
745 B explaining the observed expression changes for *srh-234* in *mef-2* mutants, and *sre-1*  
746 with a *srh-234* MEF2-binding site inserted in its promoter upstream and close to the  
747 identified E-box that drives *sre-1* expression in the ADL neuron. +, +++, and +++(+)  
748 indicates low, high, and highly increased expression levels, respectively.

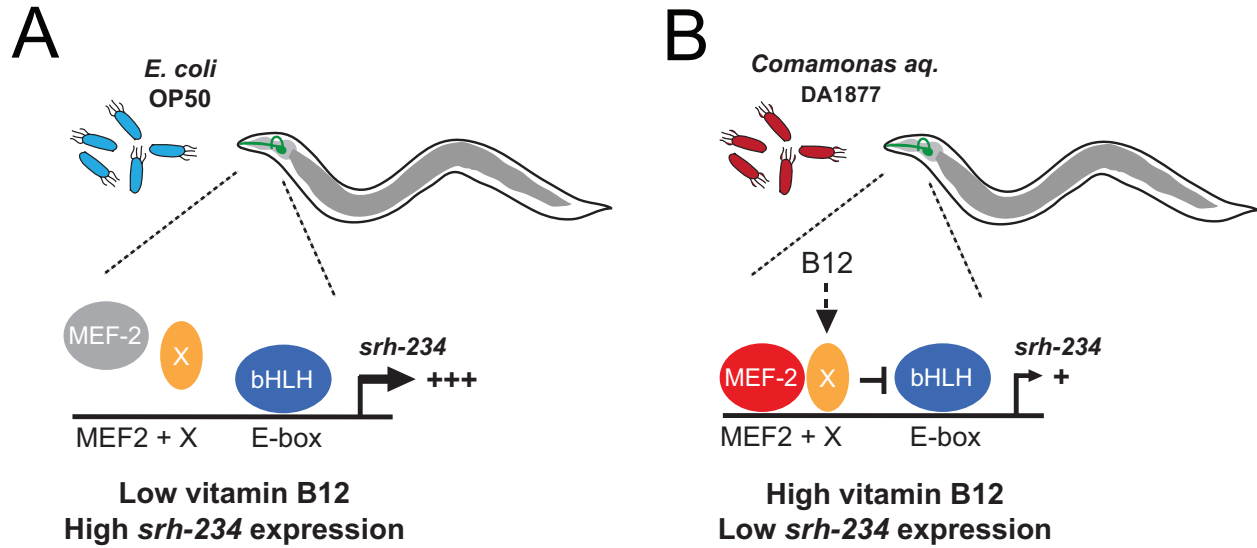

749

750

751

752

753

754

755

756

757

**Fig. 6: Model for the regulation of *srh-234* chemoreceptor expression levels in the ADL sensory neuron under different dietary conditions.** Expression levels of *srh-234* in *C. elegans* animals is high (+++) when fed a low vitamin B12 diet of *E. coli* OP50 bacteria (**A**) but low (+) when fed a high vitamin B12 diet of *Comamonas aq.* DA1877 bacteria (**B**). An unknown factor (X) may act together with the MEF-2 transcription factor to repress *srh-234* expression levels under conditions of high vitamin B12 via a bHLH/E-box module important to promote expression of *srh-234* in ADL.
